# Supplementary material for: The Potential Role of the Methionine Aminopeptidase Gene PxMetAP1 in a Cosmopolitan Pest for Bacillus thuringiensis Toxin Tolerance
Source: MDPI journal article supplement (doi:10.3390/ijms232113005), 2022-10-27
Supplement: s1 [file s1]

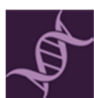

## Supplementary Material

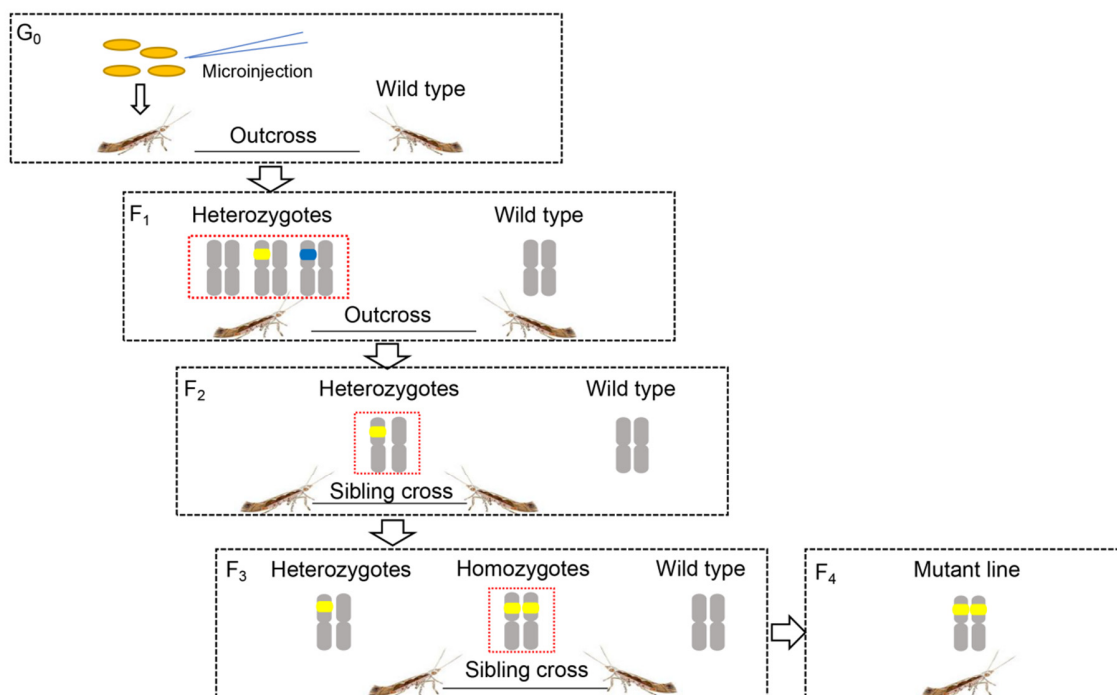

**Figure S1.** Flowchart of homozygous mutant strain screening. Each long box represents a single pair of male and female adults, the red box represents a single pair of parents whose mutations were identified by sequencing and retained for next-generation mating, and different colors represent different types of mutations.

**Table S1.** Inheritance of resistance between *PxMetAP1* gene and Cry1Ac in *P. xylostella*.

| Backcross family <sup>a</sup> | Untreated control |                                   | Cry1Ac treated |                                   |
|-------------------------------|-------------------|-----------------------------------|----------------|-----------------------------------|
|                               | N <sup>b</sup>    | Larvae with<br>$R_{MI}R_{MI}$ (%) | N <sup>c</sup> | Larvae with<br>$R_{MI}R_{MI}$ (%) |
| BCa1                          | 37                | 52.6                              | 19             | 100                               |
| BCa2                          | 43                | 45.9                              | 20             | 100                               |
| BCa3                          | 39                | 43.2                              | 18             | 100                               |
| BCa4                          | 45                | 47.7                              | 22             | 100                               |
| BCa5                          | 47                | 44.3                              | 18             | 100                               |
| BCb1                          | 44                | 54.1                              | 23             | 100                               |
| BCb2                          | 42                | 51.5                              | 19             | 100                               |
| BCb3                          | 36                | 48.4                              | 24             | 100                               |
| BCb4                          | 38                | 50.8                              | 22             | 100                               |
| BCb5                          | 46                | 46.7                              | 21             | 100                               |
| Total                         | 417               | -                                 | 206            | -                                 |

<sup>a</sup> Backcross family a (BCa1-5) was produced by an F<sub>1</sub> female with a Cry1S1000 male, and backcross family b (BCb1-5) was produced by an F<sub>1</sub> male with a Cry1S1000 female.

<sup>b</sup> Number of early 3rd instar larvae used for control (normal diet) and genotyped in each backcross family.

<sup>c</sup> Number of surviving early 3rd instar larvae in each backcross family that were genotyped for the treatment group (diet containing 0.5 µg/mL Cry1Ac toxin). 40 larvae were picked for each backcross family in the treatment group, for a total of 400 larvae.

**Table S2.** Susceptibility of different *P. xylostella* strains to Bt toxin.

| Toxins | Strains       | Slope (SE)    | LC <sub>50</sub> (µg/mL) | 95% CI          | RR <sup>a</sup> |
|--------|---------------|---------------|--------------------------|-----------------|-----------------|
| Cry1Ac | G88           | 3.515 (0.382) | 0.155                    | 0.138-0.174     | 1               |
|        | G88-No-Indel  | 4.664 (0.569) | 0.158                    | 0.140-0.177     | 1.02            |
|        | PxMetAP1-KI-7 | 3.171 (0.269) | 0.865                    | 0.755-0.993     | 5.58            |
| Cry1Ab | G88           | 2.292 (0.181) | 1.966                    | 1.618-2.395     | 1               |
|        | G88-No-Indel  | 1.932 (0.146) | 2.040                    | 1.653-2.516     | 1.04            |
|        | PxMetAP1-KI-7 | 2.401 (0.221) | 6.781                    | 5.593-8.121     | 3.45            |
| Cry2Aa | G88           | 3.625 (0.375) | 50.818                   | 44.576-58.000   | 1               |
|        | G88-No-Indel  | 4.337 (0.453) | 49.943                   | 43.853-57.329   | 0.98            |
|        | PxMetAP1-KI-7 | 4.147 (0.419) | 156.192                  | 137.422-177.645 | 3.07            |
| Cry2Ab | G88           | 3.578 (0.314) | 12.563                   | 8.267-17.958    | 1               |
|        | G88-No-Indel  | 3.310 (0.287) | 13.102                   | 9.111-17.985    | 1.04            |
|        | PxMetAP1-KI-7 | 2.885 (0.241) | 28.448                   | 20.599-37.992   | 2.26            |

<sup>a</sup> RR=LC<sub>50</sub> of each strain / LC<sub>50</sub> of G88 strain
